# Supplementary material for: The Diagnostic Performance of Tumor Stage on MRI for Predicting Prostate Cancer-Positive Surgical Margins: A Systematic Review and Meta-Analysis
Source: MDPI journal article supplement (doi:10.3390/diagnostics13152497), 2023-07-27
Supplement: s1 [file s1]

### **PubMed search strategy**

#1 Prostatic Neoplasms [MeSH Major Topic]  
#2 Prostate Cancer [Title/Abstract]  
#3 Prostatic carcinoma [Title/Abstract]  
#4 Prostatic tumor [Title/Abstract]  
#5 #1 OR #2 OR #3 OR #4  
#6 Magnetic Resonance Imaging [MeSH Major Topic]  
#7 MRI [Title/Abstract]  
#8 #6 OR #7  
#9 Margins of Excision [MeSH Major Topic]  
#10 Surgical Margins [Title/Abstract]  
#11 Resection Margins [Title/Abstract]  
#12 #9 OR #10 OR #11  
#13 #5 AND #8 AND #12  
#14 #13 AND ("2000/01/31"[Date - Publication] : "2022/12/31"[Date - Publication])

### **EMBASE search strategy**

#1 'prostate cancer'/exp  
#2 'prostate tumor'/exp  
#3 prostate carcinoma:ti,ab,kw  
#4 #1 OR #2 OR #3  
#5 MRI:ti,ab,kw  
#6 'magnetic resonance imaging':ti,ab,kw  
#7 'nuclear magnetic resonance imaging'/exp  
#8 #5 OR #6 OR #7  
#9 'surgical margin'/exp  
#10 'resection margins':ti,ab,kw  
#11 'margins of excision':ti,ab,kw  
#12 #9 OR #10 OR #11  
#13 #4 AND #8 AND #12  
#14 #4 AND #8 AND #12 AND [01-01-2000]/sd NOT [12-31-2022]

### **Cochrane search strategy**

#1 MeSH descriptor: [Prostatic Neoplasms] explode all trees  
#2 Prostate Prostate Cancer or Prostatic carcinoma or Prostatic tumor Cancer  
#3 #1 or #2  
#4 MeSH descriptor: [Magnetic Resonance Imaging] explode all trees  
#5 MRI  
#6 #4 or #5  
#7 MeSH descriptor: [Margins of Excision] explode all trees  
#8 Surgical Margins or Resection Margins  
#9 #7 or #8  
#10 #3 and #6 and #9 with Cochrane Library publication date Between Jan 2000 and Dec 2022
